# Supplementary material
Source: publisher site journal article supplement (https://www.dovepress.com/article/286408)
Supplement: Supplementary file 1 [file get_supplementary_file.php]

**Supporting Materials**

***ALYREF* drives cancer cell proliferation through an *ALYREF-MYC* positive feedback loop in glioblastoma**

Jianjun Wang1, 5, †, Yuchen Li2**,** 5, Binbin Xu3, 5, Jiao Dong1, Haiyan Zhao1, Dongxia Zhao1, Yong Wu4, †

1Department of Pediatric Medicine, Gansu Provincial People's Hospital, Lanzhou City, 730000, Gansu Province, China;

2Fudan University Shanghai Cancer Center and Institutes of Biomedical Sciences, Shanghai Medical College, Fudan University, Shanghai, 200032, China;

3Department of Ophthalmology, Eye, Ear, Nose, and Throat Hospital, Fudan University, Shanghai, China;

4Department of Gynecologic Oncology, Fudan University Shanghai Cancer Center, Shanghai, China;

5 Equally contributing authors

†**Corresponding authors:** Jianjun Wang, M.D., [jianjunwang211@163.com](mailto:jianjunwang211@163.com), Department of Pediatric Medicine, Gansu Provincial People's Hospital, Lanzhou City, 730000, Gansu Province, China; or Yong Wu, M.D., [edison-1016@163.com](mailto:edison-1016@163.com), Department of Gynecologic Oncology, Fudan University Shanghai Cancer Center, Shanghai, China.

**Supporting Figures**


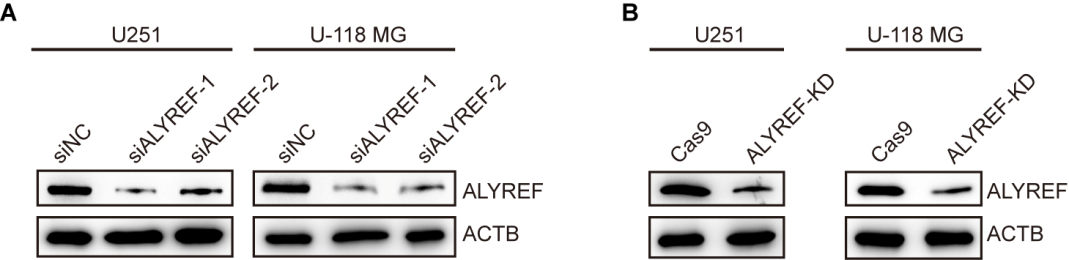


Figure S1. Immunoblotting for *ALYREF* proteins. (A) Immunoblotting for *ALYREF* proteins in U251 and U-118 MG cells after transfection with *ALYREF* siRNAs or the negative control (NC) siRNA. (B) Immunoblotting for *ALYREF* proteins in U251 and U-118 MG cells after infection with *ALYREF* knockdown sgRNA or control sgRNA lentivirus.

**Supporting TABLE S1. Primers, sgRNA Sequences, and siRNA Sequences**

| Gene | Sequence |
| --- | --- |
| *ALYREF-qF* | GCAGGCCAAAACAACTTCCC |
| *ALYREF-qR* | AGTTCCTGAATATCGGCGTCT |
| *SKP2-qF* | ATGCCCCAATCTTGTCCATCT |
| *SKP2-qR* | CACCGACTGAGTGATAGGTGT |
| *DVL2-qF* | TCAGCAGCGTCACAGATTCC |
| *DVL2-qR* | GTCTCCCCGCTCATTGCTC |
| *AXIN2-qF* | CAACACCAGGCGGAACGAA |
| *AXIN2-qR* | GCCCAATAAGGAGTGTAAGGACT |
| *MYC-qF* | TCTCTCCGTCCTCGGATTCT |
| *MYC-qR* | GACTCTGACCTTTTGCCAGGA |
| *HDAC2-qF* | TCCGCATGACCCATAACTTGC |
| *HDAC2-qR* | CCGCCAGTTGAGAGCTGAC |
| *NOTCH1-qF* | GAGGCGTGGCAGACTATGC |
| *NOTCH1-qR* | CTTGTACTCCGTCAGCGTGA |
| *NOTCH4-qF* | TGTGAACGTGATGTCAACGAG |
| *NOTCH4-qR* | ACAGTCTGGGCCTATGAAACC |
| *MAML1-qF* | GACTCTCTCAACAAAAAGCGTCT |
| *MAML1-qR* | AGGAAATGACTCACTGGGGTTA |
| *CSNK1E-qF* | CCGCATCGAGTATATCCACTCC |
| *CSNK1E-qR* | CGTGTTGATGGAAGCGTAGC |
| *FRAT1-qF* | CCACGCCCTGTCTAAAGTGT |
| *FRAT1-qR* | TGCAAAACACTGCGCTCTTC |
| *HDAC5-qF* | TCTTGTCGAAGTCAAAGGAGC |
| *HDAC5-qR* | GAGGGGAACTCTGGTCCAAAG |
| *CUL1-qF* | GGTTCGCCGTGAATGTGAC |
| *CUL1-qR* | CCCCAATTCCACGTAAGACTGT |
| *NKD1-qF* | GAGGACGACTTTCGGCTGG |
| *NKD1-qR* | GACCTTGCCGTTGTTGTCAAA |
| *ACTB-qF* | TTGTTACAGGAAGTCCCTTGCC |
| *ACTB-qR* | ATGCTATCACCTCCCCTGTGTG |
| *siALYREF-1* | TGGGAAACTGCTGGTGTCCAA |
| *siALYREF-2* | GCGAGAATGGACACCAGTT |
| *sgALYREF-1* | GGGACTCACTCTCGCATTAT |
| *sgALYREF-2* | AGTCTCAGACGCCGATATTC |
| *ChIP-ALYREF-qF* | TTCGCCAACCTAATCACGCA |
| *ChIP-ALYREF-qR* | CGCGACTGTGGTCGTTTTTA |
| *CLIP-MYC-qF* | GGAAGCGAGATTTGAACC |
| *CLIP-MYC-qR* | GGGAACTGATGCCTGACC |

**Supporting TABLE S2. Antibodies Used in This Study**

| Name | Company | Catalog Number | Use |
| --- | --- | --- | --- |
| ALYREF | Abcam | ab202894 | WB, CLIP |
| Flag-tag | Cell signaling technology | 14793 | ChIP |
| ACTB | Sigma-Aldrich | A2228 | WB |
